# Supplementary material
Source: publisher figshare collection journal article supplement (https://asha.figshare.com/articles/dataset/_/21714311)
Supplement: Supplementary file 1 [file 2]

**Supplemental Material S1.** Search strings and number of articles located.

| Databases         | Broad Search String                                                                                                                                         | Number of Articles |
|-------------------|-------------------------------------------------------------------------------------------------------------------------------------------------------------|--------------------|
| ComDisDome        | <i>((foster care) AND (parent* OR caregiver* OR foster parent*)) AND (infant* OR toddler* OR preschooler*)</i>                                              | 20                 |
| EBSCO Host (ERIC) |                                                                                                                                                             | 58                 |
| PsycINFO          |                                                                                                                                                             | 426                |
| PubMed            |                                                                                                                                                             | 569                |
| TOTAL             |                                                                                                                                                             | 1,073              |
| Databases         | Database-Specific Search Strings                                                                                                                            | Number of Articles |
| ComDisDome        | <i>((("Caregiver-to-Toddler Communication") OR ("Caregiver-Infant Interaction"))) AND ((("Preschool Children") OR ("Infants") OR ("Toddlers")))</i>         | 2                  |
| EBSCO Host (ERIC) | <i>((DE "Foster Care") AND (DE "Parents" OR DE "Caregivers"))) AND (DE "Infants" OR DE "Toddlers" OR DE "Preschool Children"))</i>                          | 11                 |
| PsycINFO          | <i>((DE "Foster Care") AND (DE "Parents" OR DE "Caregivers" OR DE "Foster Parents") AND (DE "Foster Children" OR DE "Preschool Students"))</i>              | 176                |
| PubMed            | <i>((("Foster Home Care"[Mesh]) AND ("Parents"[Mesh] OR "Caregivers"[Mesh]) AND ("Infant"[Mesh] OR "Child, Preschool"[Mesh] OR "Child, Foster"[Mesh])))</i> | 193                |
| TOTAL             |                                                                                                                                                             | 382                |
