# Supplementary material
Source: publisher figshare collection journal article supplement (https://asha.figshare.com/articles/dataset/_/21714311)
Supplement: Supplementary file 2 [file 2]

### Supplemental Material S3. Foster care intervention programs across studies.

| Intervention                                                    | Studies from the Review                                                                                        | Description of the Approach                                                                                                                                                                                                                                                                                                                                                                                                                                                                   |
|-----------------------------------------------------------------|----------------------------------------------------------------------------------------------------------------|-----------------------------------------------------------------------------------------------------------------------------------------------------------------------------------------------------------------------------------------------------------------------------------------------------------------------------------------------------------------------------------------------------------------------------------------------------------------------------------------------|
| Attachment and Biobehavioral Catch-up (ABC)                     | Bernard et al., 2017<br>Bick & Dozier, 2013<br>Dozier et al., 2009<br>Dozier et al., 2006<br>Raby et al., 2019 | A strengths-based home-visiting coaching program; supports caregivers in developing strategies for nurturing their infants/toddlers (0–4 years) while increasing caregiver responsiveness to enhance development and build strong adult/child relationships; intervention directly targets child dysregulation (behavior, emotions) with indirect impacts found for child receptive vocabulary. 10, 1-hour sessions across 10 weeks.                                                          |
| Child Adult Relationship Enhancement (CARE)                     | Messer et al., 2018                                                                                            | A skill-based training for caregivers that promotes responsive relationships between caregivers and children with histories of trauma; caregivers are taught to communicate with children in ways that are aligned with the authoritarian parenting style (limit criticism, praise appropriate behavior, use reflective listening techniques, give simple, positively stated directions, etc.); caregivers’ use of strategies supports child emotion regulation. 6 hours across 1–6 sessions. |
| Early Intervention Foster Care (EIFC)                           | Fisher et al., 2000                                                                                            | A program that supports caregivers in facilitating a therapeutic relationship with foster children; caregivers are taught strategies to reduce problem behaviors and build prosocial behaviors in children (e.g., techniques for consistent and non-abusive discipline, positive reinforcement, and monitoring/supervision); caregivers receive support through preservice training, telephone calls, home visits, support group meetings, and on-call crisis intervention.                   |
| Foster Carer-Foster Child Intervention (FFI)                    | Van Andel et al., 2016                                                                                         | A preventative program for caregivers with newly placed foster children under the age of 5 years; intervention focuses on building reciprocal relationship between the adult and child to help the child feel safe in their new living environment; during home visits, caregivers are taught to recognize and appropriately respond to different child behaviors/emotions, specifically avoidant behaviors. 6, 90-min sessions across 3 months.                                              |
| Fostering Connections (FC)                                      | Lotty et al., 2020                                                                                             | A manualized program that supports caregivers in providing trauma-informed care to reduce foster children’s behavioral and emotional difficulties resulting from past trauma; through community-based trainings, caregivers build knowledge and understanding of trauma as well as effective strategies to build relationships with foster children. 6, 3.5-hour sessions across 6 weeks.                                                                                                     |
| Incredible Years (IY)                                           | Bywater et al., 2011<br>Conn et al., 2018<br>Linares et al., 2006                                              | A trauma-informed parenting program delivered in a group format, focusing on parenting skills to prevent, reduce, and treat behavior problems in children 2–8 years; caregivers are taught how to build the child’s social competence through engagement, praise, incentives, limited use of non-aversive discipline, and play-based activities. 12–14, 2–2.5-hour sessions across 12–14 weeks.                                                                                               |
| Keeping Foster and Kinship Parents Trained and Supported (KEEP) | Greeno et al., 2016<br>Leathers et al., 2011<br>Roberts et al., 2016<br>Uretsky et al., 2017                   | A program for caregivers to increase positive parenting, decrease negative child behaviors, and increase foster care placement stability; caregivers are taught skills to reduce child problem behaviors and caregiver stress (e.g., reward systems, setting limits, avoiding power struggles, etc.); has been delivered in community or home settings. 16, 1.5-hour sessions across 16 weeks.                                                                                                |

|                                                                  |                                                                   |                                                                                                                                                                                                                                                                                                                                                                                                                                                                                                                                                            |
|------------------------------------------------------------------|-------------------------------------------------------------------|------------------------------------------------------------------------------------------------------------------------------------------------------------------------------------------------------------------------------------------------------------------------------------------------------------------------------------------------------------------------------------------------------------------------------------------------------------------------------------------------------------------------------------------------------------|
| Multidimensional Treatment Foster Care for Preschoolers (MTFC-P) | Lynch et al., 2014                                                | A collection of services over 9–12 months for preschool-aged foster children; services include foster parent training, intervention with a behavior specialist, and playgroup sessions for the children; caregivers are taught how to maintain a home environment that is positive, consistent, and responsive to the child along with strategies for encouraging positive child behavior and responding to problem behaviors; caregivers are supported through a 12-hour intensive training, daily phone calls, weekly support groups, and on-call staff. |
| Parent-Child Interaction Therapy (PCIT)                          | McNeil et al., 2005<br>Mersky et al., 2016<br>Timmer et al., 2006 | A parent training intervention that focuses on child-directed interaction and parent-direction interaction to promote authoritative parenting and positive parent-child interactions through relationship-enhancing play; caregivers learn to use consistent attention, affection, and guidance as well as effective discipline and behavior management strategies to reduce negative child behaviors; therapy can be offered in brief or extended formats. 2–3, 7-hour sessions across 2–3 days + 8–14 weeks of home visiting sessions.                   |
| Parent Management Training Oregon (PMTO)                         | Maaskant et al., 2017                                             | An intensive, individualized parent training program that supports caregivers in increasing their use of positive parenting practices and diminishing coercive practices to support positive child behavior; caregivers learn to identify and appropriately respond to child emotions, enhance communication, give clear directions, and track child behavior. ~25 sessions across 6–9 months.                                                                                                                                                             |
| Parks Parenting Approach (PPA)                                   | Davies et al., 2015                                               | A course delivered in a group setting for foster parents, which can be completed prior to or after placement of a foster child; the course focuses on child behavior, supporting caregivers in identify behavior patterns, and parenting strategies to facilitate positive interactions (e.g., praise, rewards, play); the course also helps caregivers identify their own needs, accept their mistakes, and take respite when necessary. 9, 2-hour sessions across 9 weeks.                                                                               |
| Resource Parent Curriculum (RPC)                                 | Gigengack et al., 2019                                            | A course delivered to foster parents in a group setting to increase knowledge and skills related to post-traumatic stress in children who have experienced trauma; caregivers learn the effects of trauma, how to promote safety, and strategies for responding to feelings and behaviors related to trauma. 8, 2.5-hour sessions across 4 weeks.                                                                                                                                                                                                          |
| Taking Care Triple P for foster parents (TCTP)                   | Job et al., 2020                                                  | A comprehensive, manualized parenting support program delivered in a group setting that teaches caregivers strategies to promote positive, caring, and consistent parenting practices while reducing instances of maltreatment; caregivers are taught strategies to help children develop, manage behavior, build self-esteem, and promote resilience. 5, 2.5-hour sessions across 5 weeks + 2, 20-min phone consultations.                                                                                                                                |

---
