# Supplementary material
Source: publisher figshare collection journal article supplement (https://asha.figshare.com/articles/dataset/_/21714311)
Supplement: Supplementary file 3 [file 2]

**Supplemental Material S4.** Additional information on methods and outcomes of foster parent training.

| Author & Year          | Instructors for Foster Parent Training |                         |           |                         |                       | Adult Outcome          |                        | Attrition       |
|------------------------|----------------------------------------|-------------------------|-----------|-------------------------|-----------------------|------------------------|------------------------|-----------------|
|                        | <i>N</i>                               | Training Location       | Education | Discipline              | IMP Fidelity Reported | INT Fidelity Reported? | Effect Sizes Reported? |                 |
| *Bernard et al., 2017  | NR                                     | Home                    | NR        | NR                      | No                    | No                     | No                     | NR              |
| Bick, & Dozier, 2013   | NR                                     | Home                    | NR        | NR                      | No                    | No                     | No                     | NR              |
| Bywater et al., 2011   | 7                                      | NR                      | NR        | NR                      | No                    | No                     | Yes                    | NR              |
| Conn et al., 2018      | NR                                     | Community Setting       | GD        | Psychology              | No                    | No                     | No                     | I = 3<br>C = 2  |
| Davies et al., 2015    | NR                                     | NR                      | NR        | Social Work             | No                    | No                     | No                     | 5               |
| Dozier et al., 2009    | NR                                     | Home                    | NR        | Social Work, Psychology | No                    | No                     | No                     | 0               |
| Dozier et al., 2006    | NR                                     | Home                    | CD, GD    | Social Work, Psychology | No                    | No                     | N/A                    | 0               |
| Fisher et al., 2000    | NR                                     | Home                    | GD        | NR                      | No                    | No                     | Yes                    | NR              |
| Gigengack et al., 2019 | 2                                      | NR                      | NR        | Health Care             | No                    | No                     | Yes                    | 53              |
| Greeno et al., 2016    | NR                                     | Community Setting       | NR        | NR                      | No                    | No                     | Yes                    | 14              |
| Job et al., 2020       | NR                                     | NR                      | NR        | NR                      | Yes                   | Yes                    | Yes                    | I = 4<br>C = 3  |
| Leathers et al., 2011  | 2                                      | Community Setting       | GD        | Education               | Yes                   | No                     | No                     | 4               |
| Linares et al., 2006   | NR                                     | Community Setting       | NR        | NR                      | No                    | No                     | Yes                    | 0               |
| Lotty et al., 2020     | 3                                      | Home, Community Setting | NR        | NR                      | No                    | No                     | Yes                    | I = 7<br>C = 6  |
| Lynch et al., 2014     | NR                                     | NR                      | CD, GD    | Psychology              | No                    | No                     | N/A                    | NR              |
| Maaskant et al., 2017  | NR                                     | NR                      | NR        | NR                      | Yes                   | No                     | Yes                    | I = 17<br>C = 8 |

|                        |    |                         |        |             |     |    |     |                            |
|------------------------|----|-------------------------|--------|-------------|-----|----|-----|----------------------------|
| McNeil et al., 2005    | NR | Community Setting       | GD     | Psychology  | No  | No | No  | NR                         |
| Mersky et al., 2016    | 2  | Home, Community Setting | CD, GD | Education   | No  | No | N/A | I1 = 10<br>I2 = 5<br>C = 8 |
| Messer et al., 2018    | NR | Community Setting       | NR     | NR          | No  | No | Yes | I = 5<br>C = 6             |
| *Raby et al., 2019     | NR | Home                    | NR     | NR          | No  | No | Yes | 117                        |
| Roberts et al., 2016   | NR | Other                   | NR     | NR          | Yes | No | No  | 62                         |
| Timmer et al., 2006    | NR | Community Setting, Home | NR     | NR          | NR  | NR | No  | 0                          |
| Uretsky et al., 2017   | NR | NR                      | NR     | Social Work | Yes | No | N/A | 9                          |
| Van Andel et al., 2016 | NR | Home                    | CD     | NR          | No  | No | Yes | 27                         |

*Note.* Effect sizes are only reported for child language outcomes. NR = not reported; N/A = not applicable; CD = college degree (BA, BS); GD = graduate degree (MA, MS, PhD, MD, etc.); IMP = implementation; INT = intervention; I = intervention; C = control.

\*Studies that examined outcomes related to child language.
