# Supplementary material
Source: publisher figshare collection journal article supplement (https://asha.figshare.com/articles/dataset/_/21714311)
Supplement: Supplementary file 4 [file 2]

## Supplemental Material S2. Additional foster child demographics.

| Author/Year            | Diagnosis                                                       | Total Time in Foster Care                     | Time with Current Foster Family |
|------------------------|-----------------------------------------------------------------|-----------------------------------------------|---------------------------------|
| Bernard et al., 2017   | At-risk                                                         | 1–3 different placements                      | NR                              |
| Bick & Dozier, 2013    | At-risk                                                         | 3.1 months                                    | NR                              |
| Bywater et al., 2011   | At-risk                                                         | NR                                            | $M = 23.64$ months              |
| Conn et al., 2018      | At-risk                                                         | NR                                            | NR                              |
| Davies et al., 2015    | At-risk                                                         | NR                                            | NR                              |
| Dozier et al., 2009    | At-risk                                                         | NR                                            | NR                              |
| Dozier et al., 2006    | At-risk                                                         | NR                                            | NR                              |
| Fisher et al., 2000    | At-risk                                                         | NR                                            | NR                              |
| Gigengack et al., 2019 | At-risk                                                         | NR                                            | $M = 31.2$ months               |
| Greeno et al., 2016    | At-risk                                                         | > 24 months                                   | NR                              |
| Job et al., 2020       | ADHD, ODD, anxiety                                              | NR                                            | $M = 17.75$ months              |
| Leathers et al., 2011  | At-risk, behavior disorder                                      | NR                                            | NR                              |
| Linares et al., 2006   | At-risk                                                         | $M = 8.4$ months                              | NR                              |
| Lotty et al., 2020     | At-risk                                                         | 4–7 years                                     | NR                              |
| Lynch et al., 2014     | Emotion/behavior disorder                                       | 52 children with 4+ placements prior to study | NR                              |
| Maaskant et al., 2017  | At-risk                                                         | At least 1 year                               | NR                              |
| McNeil et al., 2005    | At-risk                                                         | NR                                            | NR                              |
| Mersky et al., 2016    | At-risk                                                         | NR                                            | NR                              |
| Messer et al., 2018    | At-risk                                                         | NR                                            | $M = 12.2$ months               |
| Raby et al., 2019      | At-risk                                                         | $M = 2.2$ different placements                | $M = 2.88$ years                |
| Roberts et al., 2016*  | At-risk, behavioral difficulties                                | NR                                            | $M = 2.08$ years                |
| Timmer et al., 2006    | ADHD, anxiety, possible language delay, behavioral difficulties | 2.67 years                                    | 2 months                        |
| Uretsky et al., 2015   | At-risk, medically fragile                                      | NR                                            | Min. 1 month                    |
| Van Andel et al., 2016 | At-risk                                                         | NR                                            | Min. 6 months                   |

*Note.* NR = Not Reported; DD = Developmental Delay;  $M$  = mean; ADHD = attention-deficit/hyperactivity disorder; ODD = oppositional defiant disorder.

\* = Included children ages 3–17 years but only reporting data for 6 years and under.
